# Supplementary material for: Effects of Concord grape juice flavor intensity and phenolic compound content on glycemia, appetite and cognitive function in adults with excess body weight: a randomized double-blind crossover trial
Source: Royal Society of Chemistry journal article supplement (doi:10.1039/d1fo02049h), 2021-01-01
Supplement: d1fo02049h1.pdf [file d1fo02049h1.pdf]

SUPPLEMENTAL MATERIALS

Table 1. Glycemic and appetite responses by low and high phenolic metabolizer after beverages intake alone (trial I)

| CGJ                          | 3-hydroxyhippuric acid |                 |          | Iso/ferulic-3'-O-glucuronide |                 |          |
|------------------------------|------------------------|-----------------|----------|------------------------------|-----------------|----------|
|                              | Low                    | High            | <i>p</i> | Low                          | High            | <i>p</i> |
| 4h glucose <sub>t</sub> AUC  | 22,342 ± 818           | 21,870 ± 877    | 0.697    | 23,010 ± 682                 | 19,596 ± 718    | 0.009    |
| 24h glucose <sub>t</sub> AUC | 140,270 ± 3,573        | 137,660 ± 5,084 | 0.677    | 144,176 ± 3,446              | 124,490 ± 3,485 | 0.003    |
| 24h glucose (mg/dL)          | 98.3 ± 2.4             | 96.2 ± 3.7      | 0.623    | 100.9 ± 2.4                  | 87 ± 2.4        | 0.003    |
| Hunger                       | 50.5 ± 4.4             | 54.7 ± 3.5      | 0.459    | 55.5 ± 3.3                   | 44.4 ± 4.6      | 0.078    |
| Thirst                       | 44 ± 5.6               | 51.4 ± 3.9      | 0.287    | 48.6 ± 4.5                   | 45.2 ± 3.5      | 0.673    |
| Fullness                     | 41.2 ± 2.7             | 27.5 ± 3.3      | 0.003    | 33.5 ± 3.2                   | 36.9 ± 2.3      | 0.545    |
| Desire                       | 53.1 ± 4.2             | 54.4 ± 4.7      | 0.829    | 55.9 ± 3.9                   | 47.8 ± 4.2      | 0.259    |
| Prospective consumption      | 49.7 ± 4.1             | 56.7 ± 4.2      | 0.249    | 56.1 ± 3.7                   | 45.1 ± 3.8      | 0.101    |

  

| LP                           | 3-hydroxyhippuric acid |                 |          | Iso/ferulic-3'-O-glucuronide |                 |          |
|------------------------------|------------------------|-----------------|----------|------------------------------|-----------------|----------|
|                              | Low                    | High            | <i>p</i> | Low                          | High            | <i>p</i> |
| 4h glucose <sub>t</sub> AUC  | 22,944 ± 538           | 21,633 ± 830    | 0.194    | 22,640 ± 489                 | 21,893 ± 918    | 0.464    |
| 24h glucose <sub>t</sub> AUC | 144,742 ± 4,601        | 133,189 ± 3,673 | 0.058    | 142,493 ± 4358               | 134,996 ± 4,220 | 0.228    |
| 24h glucose (mg/dL)          | 103.1 ± 3.2            | 94,5 ± 2.1      | 0.032    | 100.8 ± 3.5                  | 96.5 ± 1.8      | 0.297    |
| Hunger                       | 51.3 ± 4.3             | 52.4 ± 4.2      | 0.860    | 54.3 ± 4.1                   | 49.1 ± 4.3      | 0.385    |
| Thirst                       | 39.3 ± 4.3             | 43.3 ± 5.6      | 0.573    | 42.0 ± 4.3                   | 40.5 ± 5.8      | 0.835    |
| Fullness                     | 28.9 ± 4.7             | 36.9 ± 4.0      | 0.205    | 28.9 ± 4.7                   | 37.5 ± 3.9      | 0.174    |
| Desire to eat                | 49.9 ± 4.5             | 456.5 ± 4.9     | 0.326    | 52.8 ± 4.3                   | 53.5 ± 5.3      | 0.910    |

| Prospective consumption      | 52.0 ± 4.5             | 53.8 ± 4.1      | 0.775    | 55.4 ± 4.1                   | 50.0 ± 4.4      | 0.370    |
|------------------------------|------------------------|-----------------|----------|------------------------------|-----------------|----------|
| LPF                          | Caffeic acid-O-sulfate |                 |          | Iso/ferulic-3'-O-glucuronide |                 |          |
|                              | Low                    | High            | <i>p</i> | Low                          | High            | <i>p</i> |
| 4h glucose <sub>t</sub> AUC  | 20,431 ± 759           | 23,468 ± 876    | 0.013    | 22,121 ± 876                 | 21,732 ± 927    | 0.764    |
| 24h glucose <sub>t</sub> AUC | 128,851 ± 5,130        | 147,614 ± 4,689 | 0.011    | 139,856 ± 5,302              | 136,176 ± 5,522 | 0.637    |
| 24h glucose (mg/dL)          | 90.2 ± 3.5             | 103.1 ± 3.2     | 0.010    | 97.5 ± 3.7                   | 95.5 ± 3.8      | 0.702    |
| Hunger                       | 58.1 ± 4.3             | 58.2 ± 4.0      | 0.980    | 57.4 ± 3.8                   | 59.1 ± 4.5      | 0.774    |
| Thirst                       | 46.1 ± 4.3             | 53.5 ± 5.8      | 0.314    | 53.0 ± 4.4                   | 45.7 ± 6.0      | 0.331    |
| Fullness                     | 37.6 ± 5.0             | 28.1 ± 2.8      | 0.107    | 34.8 ± 4.5                   | 30.5 ± 3.4      | 0.476    |
| Desire to eat                | 55.3 ± 4.3             | 56.7 ± 4.0      | 0.813    | 54.4 ± 4.0                   | 58.0 ± 4.2      | 0.538    |
| Prospective consumption      | 56.7 ± 4.8             | 60.6 ± 4.0      | 0.530    | 57.2 ± 4.2                   | 60.4 ± 4.7      | 0.615    |

Values are mean ± SE in low and high phenolic metabolizer classified according to the median value for each compound. The variables for each phenolic compound were compared using independent T-test ( $p < 0.05$ ). Appetitive sensations were assessed from 0-4h after beverage intake. CGJ: 100% Concord grape juice, LP: phenolic-free grape flavored drink with matched flavor essence to CGJ, LPF: phenolic-free and low flavor essence grape flavored drink.

Table 2. Glycemic and appetite responses by low and high phenolic metabolizer after beverages intake with a meal (trial II)

| CGJ                     | 4-OH-benzaldehyde isomer |                    |          | Caffeic acid-O-sulfate |                   |          |
|-------------------------|--------------------------|--------------------|----------|------------------------|-------------------|----------|
|                         | Low                      | High               | <i>p</i> | Low                    | High              | <i>p</i> |
| 4h glucose $\mu$ AUC    | 26281 $\pm$ 985          | 24897 $\pm$ 671    | 0.254    | 25943 $\pm$ 908        | 2352.94 $\pm$ 800 | 0.563    |
| 24h glucose $\mu$ AUC   | 162287 $\pm$ 5182        | 1570.91 $\pm$ 4361 | 0.449    | 159782 $\pm$ 4808      | 159596 $\pm$ 4857 | 0.979    |
| 24h glucose (mg/dL)     | 115 $\pm$ 3.5            | 109 $\pm$ 3.1      | 0.183    | 114 $\pm$ 3.4          | 111 $\pm$ 3.4     | 0.523    |
| Hunger                  | 55.1 $\pm$ 4.3           | 45.0 $\pm$ 4.1     | 0.097    | 55.2 $\pm$ 4.7         | 45.0 $\pm$ 3.6    | 0.094    |
| Thirst                  | 47.7 $\pm$ 4.9           | 38.3 $\pm$ 4.5     | 0.172    | 52.1 $\pm$ 4.1         | 34.3 $\pm$ 4.5    | 0.007    |
| Fullness                | 34.1 $\pm$ 3.2           | 36.1 $\pm$ 3.1     | 0.648    | 35.1 $\pm$ 3.3         | 35.1 $\pm$ 3.1    | 0.994    |
| Desire                  | 56.6 $\pm$ 3.7           | 44.4 $\pm$ 3.9     | 0.032    | 56.2 $\pm$ 4.2         | 44.7 $\pm$ 3.6    | 0.044    |
| Prospective consumption | 57.3 $\pm$ 4.0           | 47.7 $\pm$ 4.5     | 0.123    | 56.7 $\pm$ 4.6         | 48.3 $\pm$ 4.0    | 0.174    |
| LP                      | 4-OH-benzaldehyde isomer |                    |          | Caffeic acid-O-sulfate |                   |          |
|                         | Low                      | High               | <i>p</i> | Low                    | High              | <i>p</i> |
| 4h glucose $\mu$ AUC    | 25690 $\pm$ 981          | 25722 $\pm$ 599    | 0.978    | 25806 $\pm$ 902        | 25606 $\pm$ 713   | 0.863    |
| 24h glucose $\mu$ AUC   | 1562689 $\pm$ 4341       | 157699 $\pm$ 3778  | 0.805    | 155163 $\pm$ 4452      | 158804 $\pm$ 3598 | 0.529    |
| 24h glucose (mg/dL)     | 109 $\pm$ 3.0            | 110 $\pm$ 2.5      | 0.679    | 108 $\pm$ 3.1          | 111 $\pm$ 2.3     | 0.450    |
| Hunger                  | 49.0 $\pm$ 3.3           | 51.4 $\pm$ 3.9     | 0.649    | 46.6 $\pm$ 3.6         | 53.9 $\pm$ 3.3    | 0.147    |
| Thirst                  | 47.2 $\pm$ 4.4           | 42.4 $\pm$ 3.2     | 0.387    | 45.9 $\pm$ 3.9         | 43.8 $\pm$ 3.9    | 0.706    |
| Fullness                | 34.4 $\pm$ 4.5           | 38.4 $\pm$ 3.8     | 0.501    | 35.2 $\pm$ 4.2         | 37.6 $\pm$ 4.2    | 0.689    |
| Desire to eat           | 47.7 $\pm$ 3.9           | 44.8 $\pm$ 3.9     | 0.601    | 44.6 $\pm$ 3.9         | 48.1 $\pm$ 4.0    | 0.535    |
| Prospective consumption | 50.1 $\pm$ 3.5           | 51.8 $\pm$ 3.9     | 0.746    | 49.3 $\pm$ 3.7         | 52.6 $\pm$ 3.8    | 0.546    |

| LPF                     | 4-OH-benzaldehyde isomer |                   |          | 3-OH-phenylacetic acid isomer |                   |          |
|-------------------------|--------------------------|-------------------|----------|-------------------------------|-------------------|----------|
|                         | Low                      | High              | <i>p</i> | Low                           | High              | <i>p</i> |
| 4h glucose $\mu$ AUC    | 24980 $\pm$ 741          | 25464 $\pm$ 757   | 0.651    | 24302 $\pm$ 800               | 26141 $\pm$ 619   | 0.078    |
| 24h glucose $\mu$ AUC   | 149623 $\pm$ 3643        | 154218 $\pm$ 4067 | 0.406    | 146309 $\pm$ 3669             | 157532 $\pm$ 3616 | 0.037    |
| 24h glucose (mg/dL)     | 105 $\pm$ 2.4            | 109 $\pm$ 2.7     | 0.198    | 104 $\pm$ 2.8                 | 110 $\pm$ 2.2     | 0.078    |
| Hunger                  | 48.6 $\pm$ 3.6           | 46.6 $\pm$ 3.4    | 0.684    | 46.2 $\pm$ 3.6                | 49.0 $\pm$ 3.4    | 0.585    |
| Thirst                  | 35.8 $\pm$ 4.5           | 43.8 $\pm$ 4.3    | 0.209    | 41.5 $\pm$ 4.9                | 38.2 $\pm$ 4.0    | 0.612    |
| Fullness                | 30.1 $\pm$ 2.8           | 39.9 $\pm$ 3.8    | 0.048    | 37.3 $\pm$ 3.3                | 32.9 $\pm$ 3.8    | 0.388    |
| Desire to eat           | 46.9 $\pm$ 4.1           | 47.7 $\pm$ 4.2    | 0.885    | 43.3 $\pm$ 3.6                | 51.5 $\pm$ 4.4    | 0.160    |
| Prospective consumption | 51.0 $\pm$ 3.1           | 46.2 $\pm$ 3.0    | 0.273    | 47.3 $\pm$ 2.9                | 49.9 $\pm$ 3.3    | 0.564    |

Data expressed as mean  $\pm$  SE in low and high phenolic metabolizer classified according to the median value for each compound. The variables for each phenolic compound were compared using independent T-test ( $p < 0.05$ ). Appetitive sensations were assessed from 0-4h after beverage intake with a meal. CGJ: 100% Concord grape juice, LP: phenolic-free grape flavored drink with matched flavor essence to CGJ, LPF: phenolic-free and low flavor essence grape flavored drink.
